# Supplementary material
Source: PubMed Central journal article supplement (PMC4834234)

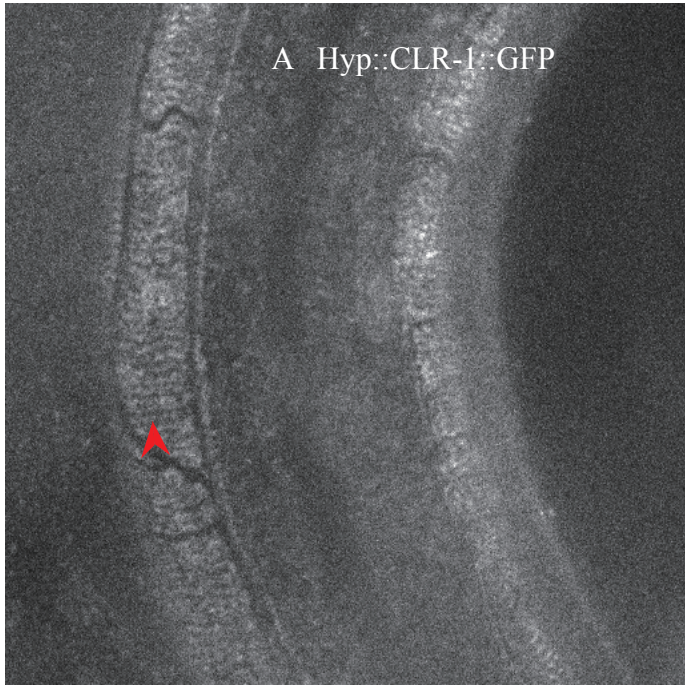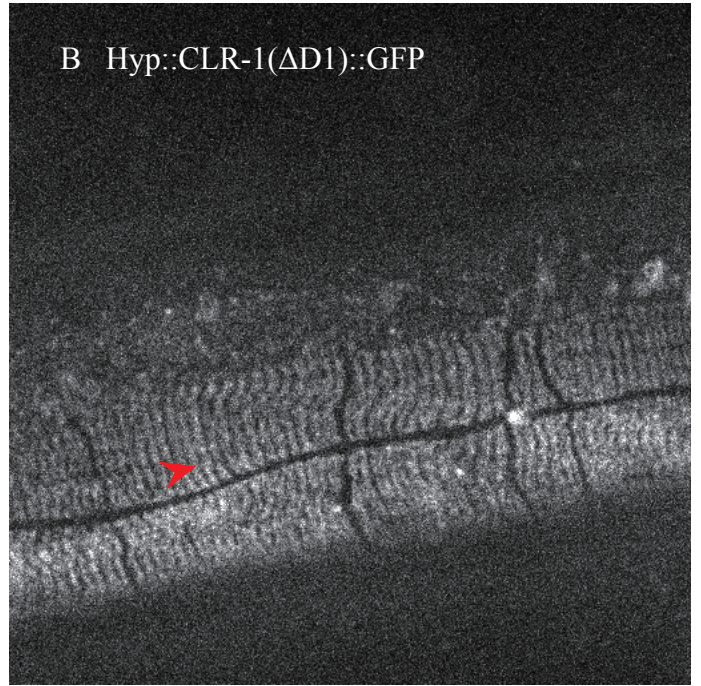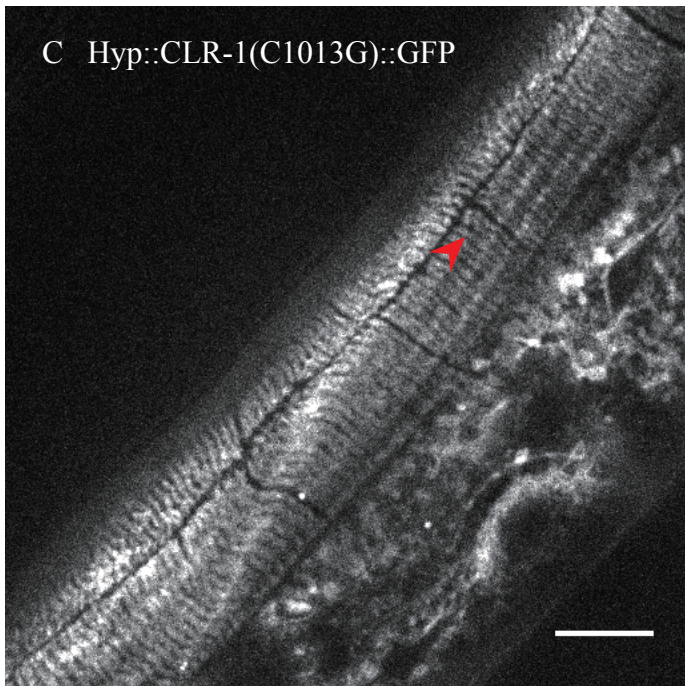

Supplement: NIHMS767203-supplement-2.pdf [file NIHMS767203-supplement-2.pdf]
